# Supplementary material for: Longitudinal and Comparative Measures of Serum Chitotriosidase and YKL-40 in Patients With Idiopathic Pulmonary Fibrosis
Source: PubMed Central journal article supplement (PMC8866556; doi:10.3389/fimmu.2022.760776), 2022-02-10
Supplement: DataSheet_1.pdf [file DataSheet_1.pdf]

**Supplementary Table S1.** Baseline correlations of serum CHIT1 and YKL-40 with clinical measures in IPF patients

|                                                       | <b>FVC</b><br><b>(l)</b> | <b>FVC</b><br><b>% pred.</b> | <b>T<sub>L,CO</sub></b><br><b>(mmol/min/kPa)</b> | <b>T<sub>L,CO</sub></b><br><b>% pred.</b> | <b>Age</b><br><b>(years)</b> | <b>CPI</b><br><b>score</b> | <b>6MWT</b><br><b>(meters)</b> |
|-------------------------------------------------------|--------------------------|------------------------------|--------------------------------------------------|-------------------------------------------|------------------------------|----------------------------|--------------------------------|
| <b>CHIT1</b><br><b>activity</b><br><b>[nmol/ml/h]</b> | r=-0.49<br>p=0.01        | r=-0.17<br>p=0.42            | r=-0.33<br>p=0.12                                | r=0.02<br>p=0.94                          | r=0.20<br>p=0.34             | r=-0.15<br>p=0.47          | r=-0.03<br>p=0.91              |
| <b>YKL-40</b><br><b>[ng/ml]</b>                       | r=0.21<br>p=0.32         | r=0.27<br>p=0.19             | r=-0.22<br>p=0.29                                | r=-0.19<br>p=0.37                         | r=0.56<br>p=0.004            | r=0.54<br>p=0.006          | r=-0.35<br>p=0.09              |

**Abbreviations:** IPF – idiopathic pulmonary fibrosis, FVC – forced vital capacity, T<sub>L,CO</sub> – transfer factor of the lung for carbon monoxide, CPI – composite physiologic index, 6MWT – six-minute walk test, CHIT1 – chitotriosidase, YKL-40 – chitinase 3-like-1

**Supplementary Table S2.** Correlations of serum CHIT1 and YKL-40 with clinical measures in IPF patients after 6 months of antifibrotic therapy

|                                                       | <b>FVC</b><br><b>(l)</b> | <b>FVC</b><br><b>% pred.</b> | <b>T<sub>L,CO</sub></b><br><b>(mmol/min/kPa)</b> | <b>T<sub>L,CO</sub></b><br><b>% pred.</b> | <b>Age</b><br><b>(years)</b> | <b>CPI</b><br><b>score</b> | <b>6MWT</b><br><b>(meters)</b> |
|-------------------------------------------------------|--------------------------|------------------------------|--------------------------------------------------|-------------------------------------------|------------------------------|----------------------------|--------------------------------|
| <b>CHIT1</b><br><b>activity</b><br><b>[nmol/ml/h]</b> | r=-0.10<br>p=0.65        | r=0.16<br>p=0.45             | r=0.13<br>p=0.55                                 | r=0.25<br>p=0.24                          | r=0.16<br>p=0.43             | r=-0.08<br>p=0.69          | r=-0.16<br>p=0.49              |
| <b>YKL-40</b><br><b>[ng/ml]</b>                       | r=0.21<br>p=0.32         | r=0.15<br>p=0.49             | r=-0.27<br>p=0.19                                | r=-0.31<br>p=0.15                         | r=0.48<br>p=0.01             | r=0.55<br>p=0.004          | r=-0.45<br>p=0.04              |

**Abbreviations:** IPF – idiopathic pulmonary fibrosis, FVC – forced vital capacity, T<sub>L,CO</sub> – transfer factor of the lung for carbon monoxide, CPI – composite physiologic index, 6MWT – six-minute walk test, CHIT1 – chitotriosidase, YKL-40 – chitinase 3-like-1

**Supplementary Table S3.** Correlations of serum CHIT1 and YKL-40 with clinical measures in IPF patients after 12 months of antifibrotic therapy

|                                      | FVC<br>(l)        | FVC<br>% pred.    | T <sub>L,CO</sub><br>(mmol/min/kPa) | T <sub>L,CO</sub><br>% pred. | Age<br>(years)   | CPI<br>score     | 6MWT<br>(meters)  |
|--------------------------------------|-------------------|-------------------|-------------------------------------|------------------------------|------------------|------------------|-------------------|
| <b>CHIT1 activity</b><br>[nmol/ml/h] | r=-0.37<br>p=0.07 | r=-0.21<br>p=0.31 | r=-0.12<br>p=0.58                   | r=-0.11<br>p=0.60            | r=0.14<br>p=0.52 | r=0.01<br>p=0.96 | r=-0.19<br>p=0.36 |
| <b>YKL-40</b><br>[ng/ml]             | r=0.38<br>p=0.06  | r=0.33<br>p=0.11  | r=-0.07<br>p=0.74                   | r=-0.02<br>p=0.94            | r=0.45<br>p=0.02 | r=0.30<br>p=0.14 | r=-0.22<br>p=0.30 |

**Abbreviations:** IPF – idiopathic pulmonary fibrosis, FVC – forced vital capacity, T<sub>L,CO</sub> – transfer factor of the lung for carbon monoxide, CPI – composite physiologic index, 6MWT – six-minute walk test, CHIT1 – chitotriosidase, YKL-40 – chitinase 3-like-1

**Supplementary Table S4.** Correlations of serum CHIT1 and YKL-40 with clinical measures in IPF patients after 18 months of antifibrotic therapy

|                                      | FVC<br>(l)        | FVC<br>% pred.    | T <sub>L,CO</sub><br>(mmol/min/kPa) | T <sub>L,CO</sub><br>% pred. | Age<br>(years)   | CPI<br>score      | 6MWT<br>(meters)  |
|--------------------------------------|-------------------|-------------------|-------------------------------------|------------------------------|------------------|-------------------|-------------------|
| <b>CHIT1 activity</b><br>[nmol/ml/h] | r=-0.32<br>p=0.12 | r=-0.09<br>p=0.68 | r=-0.15<br>p=0.49                   | r=-0.004<br>p=0.99           | r=0.10<br>p=0.63 | r=-0.18<br>p=0.38 | r=0.03<br>p=0.89  |
| <b>YKL-40</b><br>[ng/ml]             | r=0.27<br>p=0.20  | r=0.23<br>p=0.27  | r=-0.14<br>p=0.51                   | r=-0.18<br>p=0.41            | r=0.41<br>p=0.04 | r=0.33<br>p=0.10  | r=-0.32<br>p=0.13 |

**Abbreviations:** IPF – idiopathic pulmonary fibrosis, FVC – forced vital capacity, T<sub>L,CO</sub> – transfer factor of the lung for carbon monoxide, CPI – composite physiologic index, 6MWT – six-minute walk test, CHIT1 – chitotriosidase, YKL-40 – chitinase 3-like-1

**Supplementary Table S5.** Correlations of serum CHIT1 and YKL-40 with clinical measures in IPF patients after 24 months of antifibrotic therapy

|                                           | <b>FVC<br/>(l)</b> | <b>FVC<br/>% pred.</b> | <b>T<sub>L,CO</sub><br/>(mmol/min/kPa)</b> | <b>T<sub>L,CO</sub><br/>% pred.</b> | <b>Age<br/>(years)</b> | <b>CPI<br/>score</b> | <b>6MWT<br/>(meters)</b> |
|-------------------------------------------|--------------------|------------------------|--------------------------------------------|-------------------------------------|------------------------|----------------------|--------------------------|
| <b>CHIT1<br/>activity<br/>[nmol/ml/h]</b> | r=-0.23<br>p=0.28  | r=-0.19<br>p=0.36      | r=-0.17<br>p=0.44                          | r=-0.25<br>p=0.25                   | r=-0.23<br>p=0.27      | r=0.26<br>p=0.21     | r=0.12<br>p=0.60         |
| <b>YKL-40<br/>[ng/ml]</b>                 | r=0.40<br>p=0.04   | r=0.22<br>p=0.29       | r=-0.06<br>p=0.79                          | r=-0.18<br>p=0.40                   | r=0.31<br>p=0.13       | r=0.25<br>p=0.23     | r=-0.08<br>p=0.72        |

**Abbreviations:** IPF – idiopathic pulmonary fibrosis, FVC – forced vital capacity, T<sub>L,CO</sub> – transfer factor of the lung for carbon monoxide, CPI – composite physiologic index, 6MWT – six-minute walk test, CHIT1 – chitotriosidase, YKL-40 – chitinase 3-like-1

**Supplementary Table S6.** Correlations of changes in serum CHIT1 activity and YKL-40 concentration levels with changes in PFTs and 6MWT over the first year of antifibrotic treatment in the stables subgroup (n=16).

|                                                | <b>Change in<br/>FVC% pred.</b> | <b>Change in<br/>T<sub>L,CO</sub>% pred.</b> | <b>Change in<br/>6MWT in %</b> |
|------------------------------------------------|---------------------------------|----------------------------------------------|--------------------------------|
| <b>Change in CHIT1 activity in %</b>           | r=0.29<br>p=0.27                | r=0.02<br>p=0.93                             | r=-0.02<br>p=0.95              |
| <b>Change in YKL-40 concentration<br/>in %</b> | r=0.46<br>p=0.08                | r=0.16<br>p=0.54                             | r=0.09<br>p=0.74               |

**Abbreviations:** FVC – forced vital capacity, T<sub>L,CO</sub> – transfer factor of the lung for carbon monoxide, 6MWT – six-minute walk test, CHIT1 – chitotriosidase, YKL-40 – chitinase 3-like-1

**Supplementary Table S7.** Correlations of changes in serum CHIT1 activity and YKL-40 concentration levels with changes in PFTs and 6MWT over the first year of antifibrotic treatment in the progressors subgroup (n=9).

|                                            | <b>Change in FVC % pred.</b> | <b>Change in T<sub>L,CO</sub> % pred.</b> | <b>Change in 6MWT in %</b> |
|--------------------------------------------|------------------------------|-------------------------------------------|----------------------------|
| <b>Change in CHIT1 activity in %</b>       | r=-0.07<br>p=0.88            | r=0.69<br>p=0.07                          | r=-0.17<br>p=0.70          |
| <b>Change in YKL-40 concentration in %</b> | r=-0.13<br>p=0.74            | r=0.27<br>p=0.49                          | r=-0.27<br>p=0.49          |

**Abbreviations:** FVC – forced vital capacity, T<sub>L,CO</sub> – transfer factor of the lung for carbon monoxide, 6MWT – six-minute walk test, CHIT1 – chitotriosidase, YKL-40 – chitinase 3-like-1

**Supplementary Table S8.** Correlations of changes in serum CHIT1 activity and YKL-40 concentration levels with changes in PFTs and 6MWT over the second year of antifibrotic treatment in the stables subgroup (n=15).

|                                            | <b>Change in FVC % pred.</b> | <b>Change in T<sub>L,CO</sub>% pred.</b> | <b>Change in 6MWT in %</b> |
|--------------------------------------------|------------------------------|------------------------------------------|----------------------------|
| <b>Change in CHIT1 activity in %</b>       | r=-0.32<br>p=0.16            | r=-0.22<br>p=0.36                        | r=0.33<br>p=0.19           |
| <b>Change in YKL-40 concentration in %</b> | r=-0.53<br>p=0.047           | r=0.08<br>p=0.80                         | r=-0.09<br>p=0.80          |

**Abbreviations:** FVC – forced vital capacity, T<sub>L,CO</sub> – transfer factor of the lung for carbon monoxide, 6MWT – six-minute walk test, CHIT1 – chitotriosidase, YKL-40 – chitinase 3-like-1

**Supplementary Table S9.** Correlations of changes in serum CHIT1 activity and YKL-40 concentration levels with changes in PFTs and 6MWT over the second year of antifibrotic treatment in the progressors subgroup (n=10).

|                                                | <b>Change in<br/>FVC % pred.</b> | <b>Change in<br/>TL<sub>CO</sub> % pred.</b> | <b>Change in<br/>6MWT in %</b> |
|------------------------------------------------|----------------------------------|----------------------------------------------|--------------------------------|
| <b>Change in CHIT1 activity in %</b>           | r=-0.66<br>p=0.04                | r=-0.45<br>p=0.23                            | r=0.30<br>p=0.41               |
| <b>Change in YKL-40 concentration<br/>in %</b> | r=0.22<br>p=0.54                 | r=-0.37<br>p=0.34                            | r=-0.36<br>p=0.31              |

**Abbreviations:** FVC – forced vital capacity, TL<sub>CO</sub> – transfer factor of the lung for carbon monoxide, 6MWT – six-minute walk test, CHIT1 – chitotriosidase, YKL-40 – chitinase 3-like-1

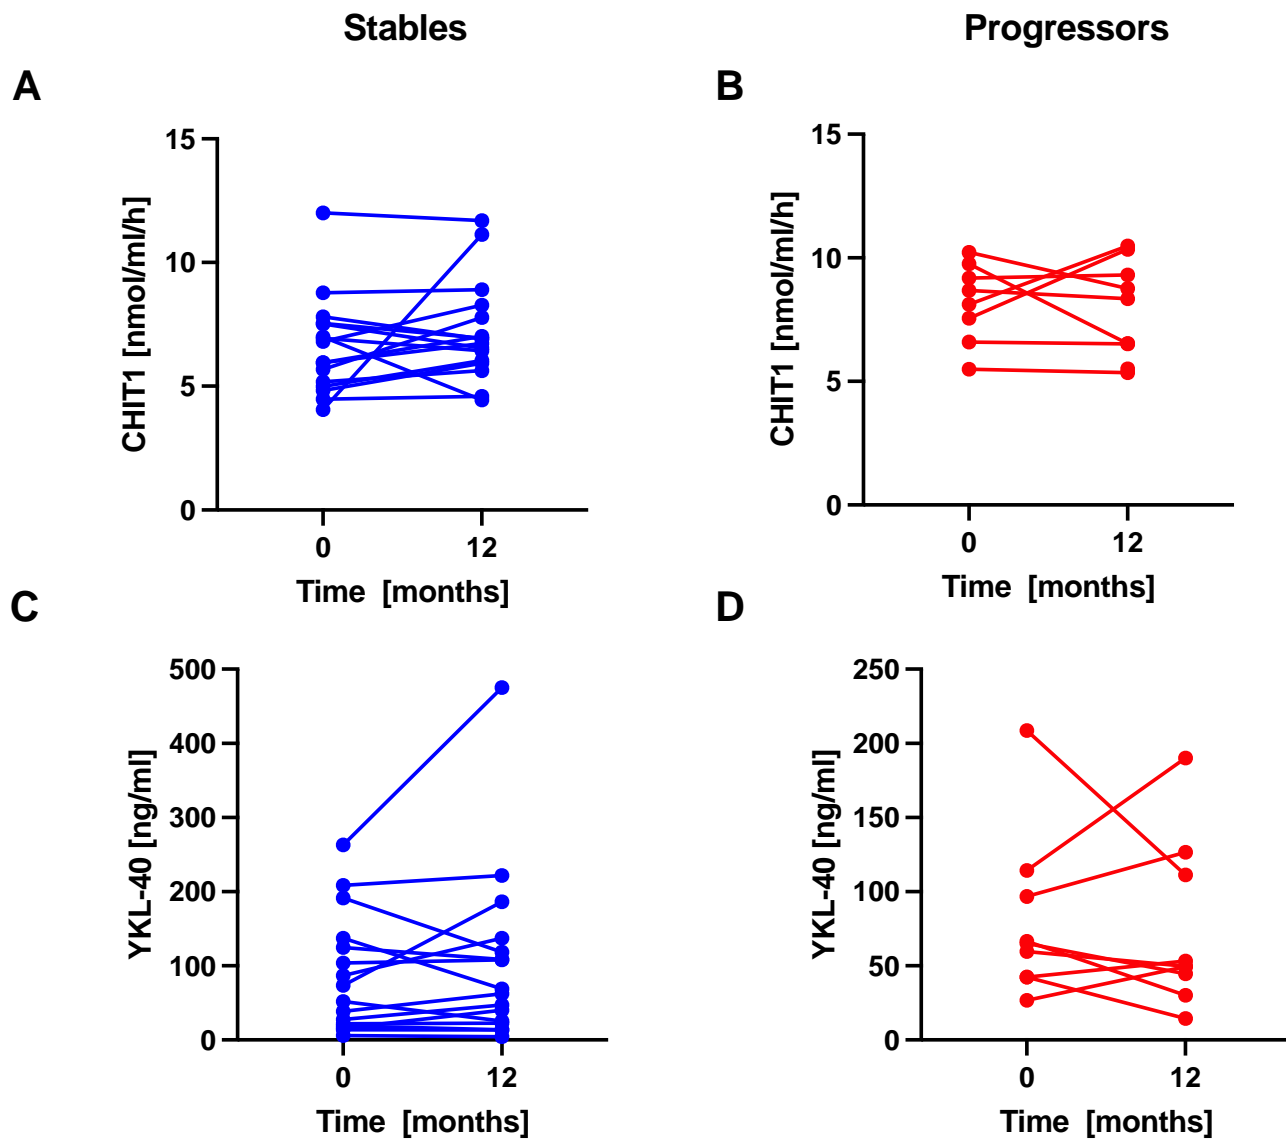

**Supplementary Figure S1.** Single patient dynamic changes in serum CHIT1 and YKL-40 over the first year of antifibrotic therapy in the stables (n=16) and progressors (n=9) subgroups of patients with IPF.

**Notes:** Panels showing dynamic changes of: (A) serum CHIT1 activity levels in the stables subgroup, (B) serum CHIT1 activity levels in the progressors subgroup, (C) serum YKL-40 concentration levels in the stables subgroup, (D) serum YKL-40 concentration levels in the progressors subgroup,

**Abbreviations:** CHIT1 – chitotriosidase, YKL-40 – chitinase 3-like-1

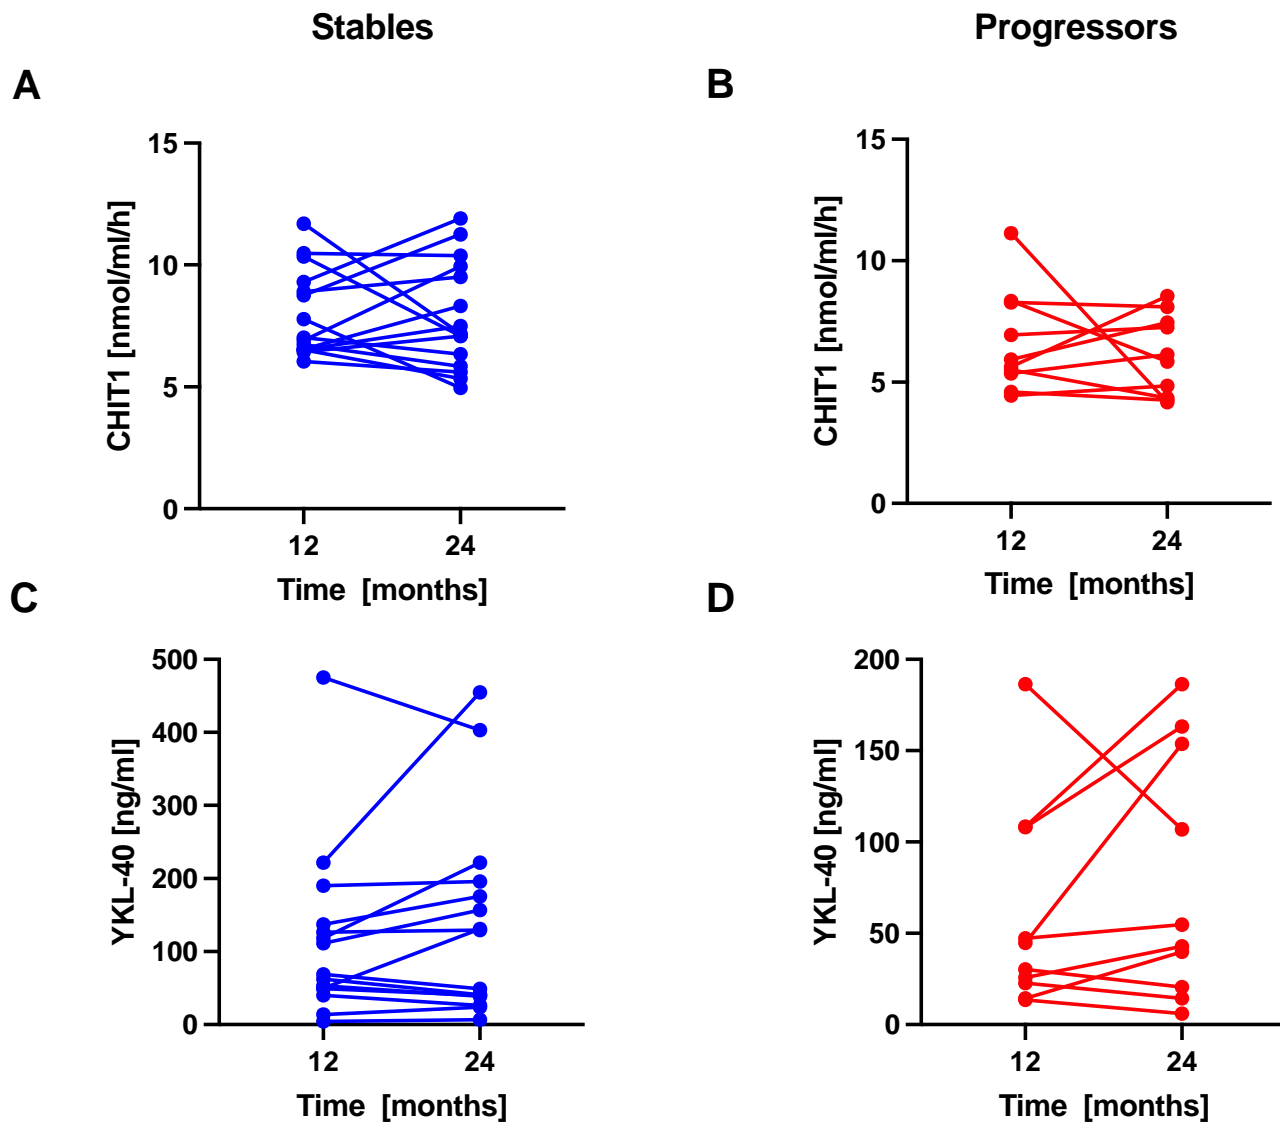

**Supplementary Figure S2.** Single patient dynamic changes in serum CHIT1 and YKL-40 over the second year of antifibrotic therapy in the stables (n=15) and progressors (n=10) subgroups of patients with IPF.

**Notes:** Panels showing dynamic changes of: **(A)** serum CHIT1 activity levels in the stables subgroup, **(B)** serum CHIT1 activity levels in the progressors subgroup, **(C)** serum YKL-40 concentration levels in the stables subgroup, **(D)** serum YKL-40 concentration levels in the progressors subgroup,

**Abbreviations:** CHIT1 – chitotriosidase, YKL-40 –chitinase 3-like-1
